# Supplementary material for: Coupled Effects of Reduced Chemical Fertilization and Biochar Supplementation on Availability and Transformations of Nitrogen and Phosphorus in Vegetable Farmland Soil: An In Situ Study in Southern China
Source: MDPI journal article supplement (doi:10.3390/agriculture11100979), 2021-10-09
Supplement: s1 [file s1]

Archive with 1 entries (1 files):
- agriculture-1406827-supplementary.pdf
