# Supplementary material for: Coupled Effects of Reduced Chemical Fertilization and Biochar Supplementation on Availability and Transformations of Nitrogen and Phosphorus in Vegetable Farmland Soil: An In Situ Study in Southern China
Source: MDPI journal article supplement (doi:10.3390/agriculture11100979), 2021-10-09
Supplement: s1 [file s1 › agriculture-1406827-supplementary.pdf]

# Supplementary Material: Coupled Effects of Reduced Chemical Fertilization and Biochar Supplementation on Availability and Transformations of Nitrogen and Phosphorus in Vegetable Farmland Soil: An In Situ Study in Southern China

Xiongsheng Yu, Yong Liu, Mu Zhang, Shaoying Ai, Rongping Wang, Li'an Zhu, Huihua Zhang, Ting Li, Yaqi Zhu, Chao Tu, Qihao Yang, Zili Zhang and Minglong Liu

**Table S1.** Analytical methods used to determine the main physicochemical properties of the vegetable farmland soil and palm silk biochar (PSB) used in the present study.

| Property                                                             | Method                                                   | Description                                                                                                                                                                                                                                                                                                      |
|----------------------------------------------------------------------|----------------------------------------------------------|------------------------------------------------------------------------------------------------------------------------------------------------------------------------------------------------------------------------------------------------------------------------------------------------------------------|
| Specific surface area                                                | BET-N <sub>2</sub> adsorption method                     | A Micromeritics ASAP 2020 automated system using N <sub>2</sub> as the adsorbate at -196°C in a relative vapor pressure of 0.025–0.3 after degastation at 105°C for 2 h                                                                                                                                          |
| pH <sub>water</sub>                                                  | Potentiometry                                            | A Sartorius PB-10 pH meter equipped with a Sartorius pH/ATC electrode (Göttingen, Germany) after stirring at a 1:2.5 soil-to-water ratio ( <i>w/v</i> ) or a 1:10 PSB-to-water ratio                                                                                                                             |
| Cation exchange capacity                                             | Ammonium acetate method                                  | Extraction with 1 mol L <sup>-1</sup> NH <sub>4</sub> OAc (pH 7.0)                                                                                                                                                                                                                                               |
| Total organic C                                                      | Volumetry                                                | Titration with 0.2 mol L <sup>-1</sup> FeSO <sub>4</sub> after K <sub>2</sub> Cr <sub>2</sub> O <sub>7</sub> -H <sub>2</sub> SO <sub>4</sub> oxidation                                                                                                                                                           |
| Total N                                                              | Kjeldahl method                                          | Steam distillation of NH <sub>3</sub> yielded after digestion with H <sub>2</sub> SO <sub>4</sub> and catalyst mixture (K <sub>2</sub> SO <sub>4</sub> : CuSO <sub>4</sub> ·5H <sub>2</sub> O : Se = 100 : 10 : 1, <i>w/w</i> ), and then titration with 0.02 mol L <sup>-1</sup> H <sub>2</sub> SO <sub>4</sub> |
| Total P                                                              | Acid digestion and Mo-Sb colorimetry                     | A MAPADA V-1200 UV-Vis spectrophotometer after digestion with H <sub>2</sub> SO <sub>4</sub> -HClO <sub>4</sub>                                                                                                                                                                                                  |
| Dissolved organic C                                                  | Water extraction and dry combustion method               | A Shimadzu TOC-V CPH TOC analyzer (Kyoto, Japan) after extraction with a 1:10 soil (or PSB) to water ratio ( <i>w/v</i> )                                                                                                                                                                                        |
| NH <sub>4</sub> <sup>+</sup> -N (or NO <sub>3</sub> <sup>-</sup> -N) | KCl extraction and continuous flow method                | A SKALAR San++ continuous flow analyzer (Breda, Netherlands) after extraction with 1 mol L <sup>-1</sup> KCl                                                                                                                                                                                                     |
| Olsen-extractable P                                                  | NaHCO <sub>3</sub> extraction and Mo-Sb colorimetry      | A MAPADA V-1200 UV-Vis spectrophotometer (Shanghai, China) after extraction with 0.05 mol L <sup>-1</sup> NaHCO <sub>3</sub> (pH 8.5)                                                                                                                                                                            |
| Water-soluble Ca                                                     | Water extraction and atomic absorption spectrophotometry | A Purkinje General TAS-990 atomic absorption spectrophotometer (Beijing, China) after extraction with a 1:10 soil (or PSB) to water ratio ( <i>w/v</i> )                                                                                                                                                         |
| C : N ratio (or C :                                                  | Division method                                          | The molar ratio of total organic carbon content to total nitrogen                                                                                                                                                                                                                                                |

P ratio)

(or total phosphorus) of soil or PSB measured in mass

**Table S2.** Analytical methods used to determine the main physicochemical properties of the compound fertilizer and calcium superphosphate used in the present study.

| Property                        | Method                                                     | Description                                                                                                                                                                                                                            |
|---------------------------------|------------------------------------------------------------|----------------------------------------------------------------------------------------------------------------------------------------------------------------------------------------------------------------------------------------|
| Moisture content                | Lyophilization or oven drying method                       | A freeze dryer at -50°C for 48 h (compound fertilizer) or an oven at 105°C for 6–8 h (calcium superphosphate)                                                                                                                          |
| pH <sub>water</sub>             | Potentiometry                                              | A Sartorius PB-10 pH meter equipped with a Sartorius pH/ATC electrode (Göttingen, Germany) after stirring at a 1:5 fertilizer-to-water ratio ( <i>w/v</i> )                                                                            |
| Total N                         | Alkalimetry after distillation                             | Steam distillation of NH <sub>3</sub> yielded after digestion with H <sub>2</sub> SO <sub>4</sub> (reduction with Cr powder & HCl), and then back-titration of excess H <sub>2</sub> SO <sub>4</sub> with 0.5 mol L <sup>-1</sup> NaOH |
| Total P                         | EDTA extraction and quinoline phosphomolybdate gravimetry  | Precipitation, filtering, washing, drying, and weighing of quinoline phosphomolybdate after extraction with 0.1 mol L <sup>-1</sup> EDTA                                                                                               |
| NH <sub>4</sub> <sup>+</sup> -N | Acidimetry after distillation                              | Titration with 0.05 mol L <sup>-1</sup> HCl after separation by cold-air distillation                                                                                                                                                  |
| NO <sub>3</sub> <sup>-</sup> -N | Ultraviolet spectrophotometry                              | A MAPADA V-1200 UV-Vis spectrophotometer after extraction with 2.5 mol L <sup>-1</sup> HOAc                                                                                                                                            |
| Amide-N                         | Subtraction method                                         | The content difference between total N and mineral N (i.e., NH <sub>4</sub> <sup>+</sup> -N and NO <sub>3</sub> <sup>-</sup> -N)                                                                                                       |
| Water-soluble P                 | Water extraction and quinoline phosphomolybdate gravimetry | Precipitation, filtering, washing, drying, and weighing of quinoline phosphomolybdate after extraction with deionized water                                                                                                            |
| Water-soluble Ca                | Water extraction and atomic absorption spectrophotometry   | A Purkinje General TAS-990 atomic absorption spectrophotometer (Beijing, China) after extraction with a 1:10 soil (or PSB) to water ratio ( <i>w/v</i> )                                                                               |

**Table S3.** Soil moisture content (dry basis) in 0–40 cm soil layer in three types of tubes.

| Tube type     | Treatment                        | Moisture content (%) |
|---------------|----------------------------------|----------------------|
| <b>S-tube</b> | Control                          | 18.4±0.0             |
|               | CF <sub>100</sub>                | 19.9±1.3             |
|               | CF <sub>90</sub> B <sub>10</sub> | 18.3±0.2             |
|               | CF <sub>85</sub> B <sub>15</sub> | 20.5±0.1             |

|        |                                  |           |
|--------|----------------------------------|-----------|
|        | CF <sub>80</sub> B <sub>20</sub> | 19.8±0.4  |
| C-tube | Control                          | 9.07±3.73 |
|        | CF <sub>100</sub>                | 12.5±0.1  |
|        | CF <sub>90</sub> B <sub>10</sub> | 8.88±2.91 |
|        | CF <sub>85</sub> B <sub>15</sub> | 9.01±2.63 |
|        | CF <sub>80</sub> B <sub>20</sub> | 9.58±0.76 |
| O-tube | Control                          | 14.5±2.5  |
|        | CF <sub>100</sub>                | 16.5±0.9  |
|        | CF <sub>90</sub> B <sub>10</sub> | 15.7±1.5  |
|        | CF <sub>85</sub> B <sub>15</sub> | 16.3±0.9  |
|        | CF <sub>80</sub> B <sub>20</sub> | 14.7±1.8  |

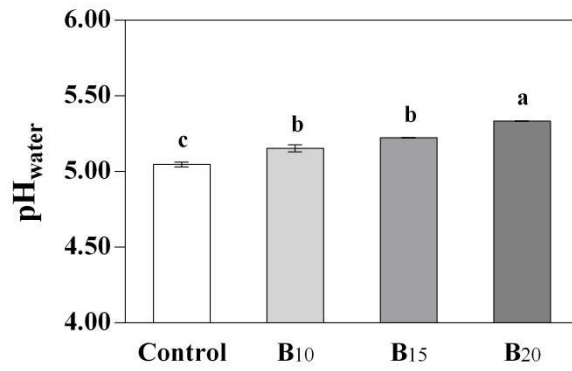

**Figure S1.** Effect of palm silk biochar (PSB) amendment on pH<sub>water</sub> in soil without chemical fertilizer addition. Treatments: Control, no fertilization; B<sub>10</sub>, 10% PSB-based fertilization; B<sub>15</sub>, 15% PSB-based fertilization; B<sub>20</sub> 20% PSB-based fertilization. Data are expressed as means ± SD ( $n = 3$ ). Bars labeled with different lowercase letters (e.g., a, b, c, etc.) indicate significant ( $p < 0.05$ ) differences among the rates of PSB application alone based on the Games–Howell test.
